# Supplementary material for: Improving satellite-retrieved aerosol microphysical properties using GOCART data
Source: Copernicus journal article supplement (doi:10.5194/amt-8-1157-2015), 2015-03-09

Supplement of Atmos. Meas. Tech., 8, 1157–1171, 2015  
<http://www.atmos-meas-tech.net/8/1157/2015/>  
doi:10.5194/amt-8-1157-2015-supplement  
© Author(s) 2015. CC Attribution 3.0 License.

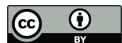

*Supplement of*

## **Improving satellite-retrieved aerosol microphysical properties using GO-CART data**

**S. Li et al.**

*Correspondence to:* Y. Liu (yang.liu@emory.edu)



Figure S2. Distributions of seasonally averaged AOD from MISR retrievals (column a), GOCART simulations (column b), this study (column c) and AERONET measurements (superposed as circles in column c) for the years 2006 to 2009, in Spring (row 1), Summer (row 2), Fall (row 3) and Winter (row 4). AERONET and GOCART data are temporally and spatially matched to MISR cloud-free conditions.

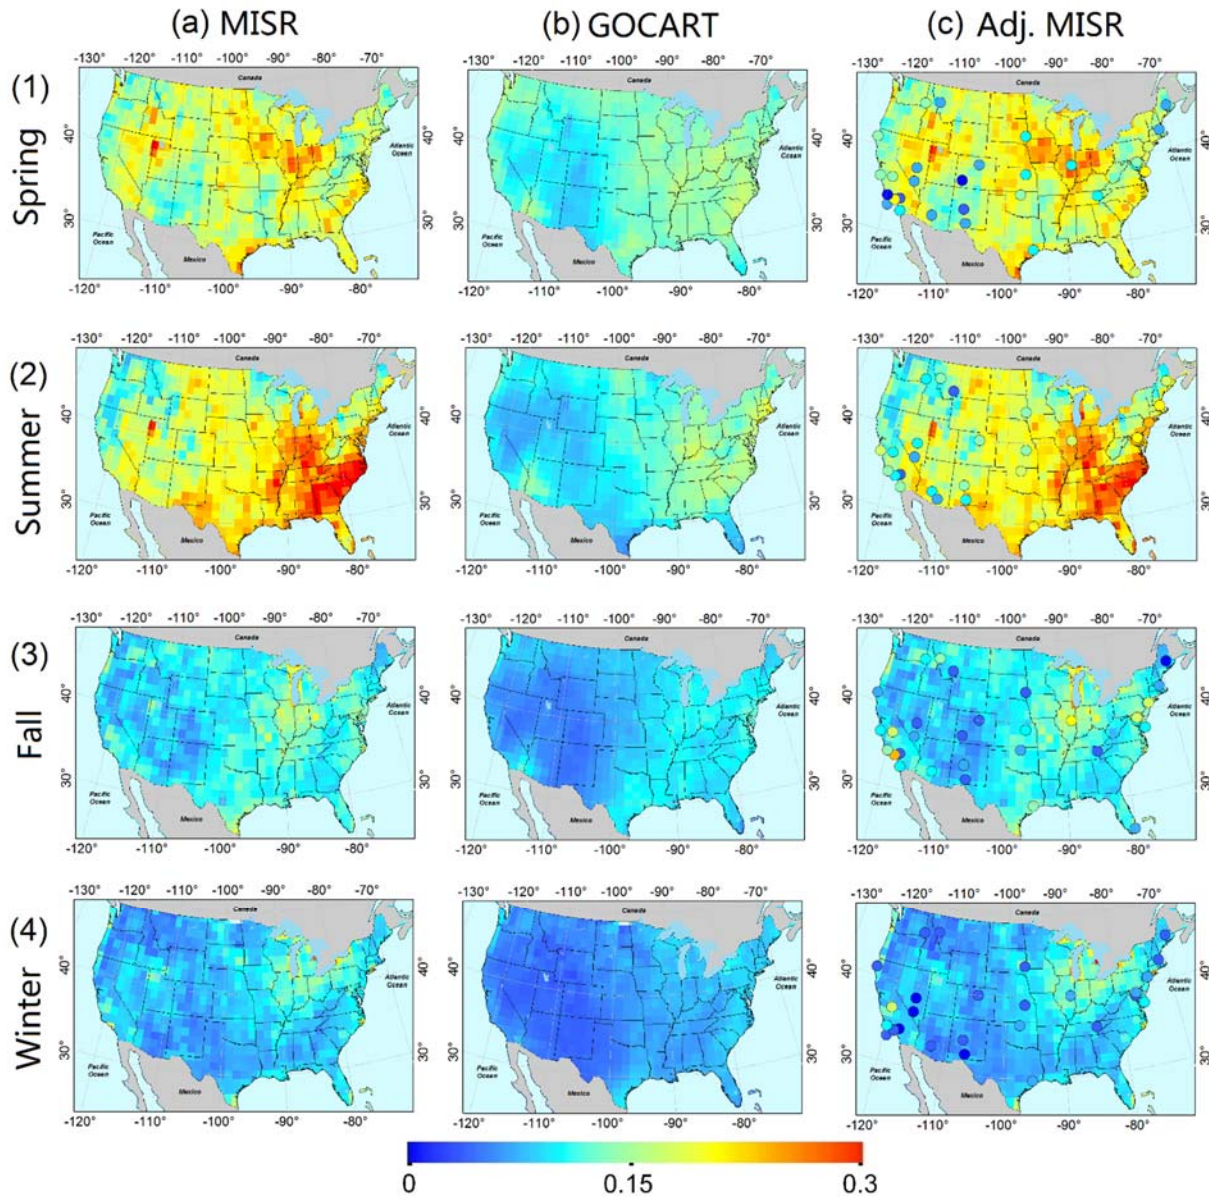

Figure S3. The distributions (counts) of (a) AOD, (b) ANG, and (c) AAOD for (1) All data set, (2) East, (3) West, (4) Spring, (5) Summer, (6) Fall, and (7) Winter, according to the value bins.

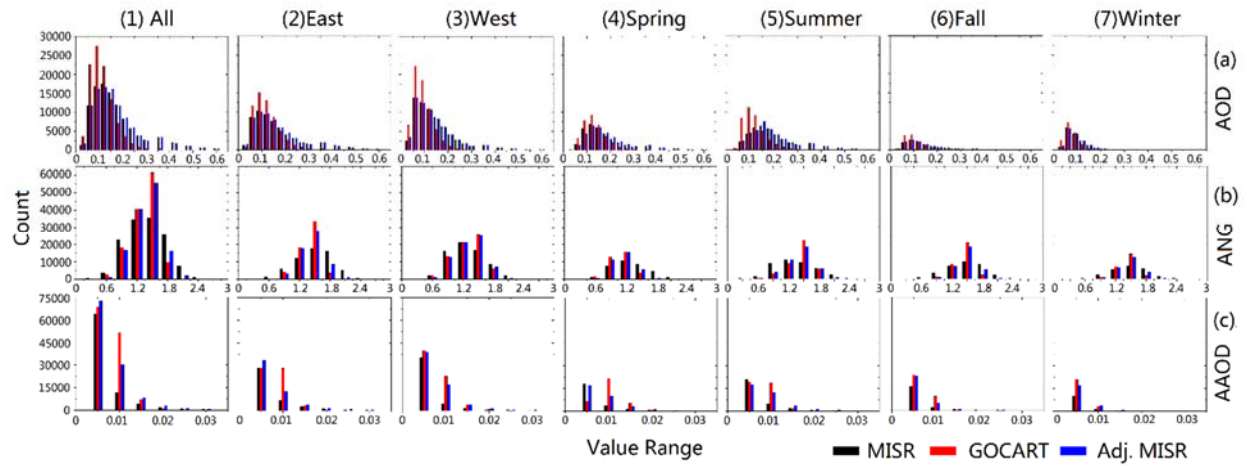

Supplement: Supplementary file 1 [file amt-8-1157-2015-supplement.pdf]
